# Supplementary material
Source: HighWire-hosted journal article supplement (https://diabetes.diabetesjournals.org/content/suppl/2007/02/28/56.3.703)
Supplement: Pg703TableS1.pdf [file Pg703TableS1.pdf]

Table S1. Donor information

| Donor | Age | Gender | BMI  | Protocol  |
|-------|-----|--------|------|-----------|
| #1    | 25  | M      | 27.6 | NIH       |
| #2    | 52  | F      | N.A. | WHI       |
| #3    | 54  | M      | 31.6 | NIH + WHI |
| #4    | 46  | M      | 21   | NIH + WHI |
| #5    | 48  | F      | 48.2 | NIH + WHI |
| #6    | 55  | F      | 18.7 | NIH + WHI |
